# Supplementary material for: Green synthesis and characterization of crystalline zinc phthalocyanine and cobalt phthalocyanine prisms by a simple solvothermal route
Source: Royal Society of Chemistry journal article supplement (doi:10.1039/c8ce00215k), 2018-01-01
Supplement: c8ce00215k1.pdf [file c8ce00215k1.pdf]

## Supplementary information

# Green Synthesis and Characterization of Crystalline Zinc Phthalocyanine and Cobalt Phthalocyanine Prisms by a Simple Solvothermal Route

Dapeng Li <sup>a,\*</sup>, Suxiang Ge <sup>b,\*\*</sup>, Tianci Yuan <sup>a</sup>, Jingjing Gong <sup>c</sup>, Baojun Huang <sup>b</sup>, Weiwei Tie <sup>b</sup>,  
Weiwei He <sup>b</sup>

*a School of Chemistry and Chemical Engineering, Key Laboratory of Micro-Nano Materials for Energy Storage and Conversion of Henan Province, Xuchang University, Henan 461000, P. R. China*

*b Institute of Surface Micro and Nano Materials, Key Laboratory of Micro-Nano Materials for Energy Storage and Conversion of Henan Province, Henan Joint International Research Laboratory of Nanomaterials for Energy and Catalysis, Xuchang University, Henan 461000, P. R. China*

*c School of Chemistry, The University of Edinburgh, Scotland, eh9 3ff, The United Kingdom of Great Britain and Northern Ireland*

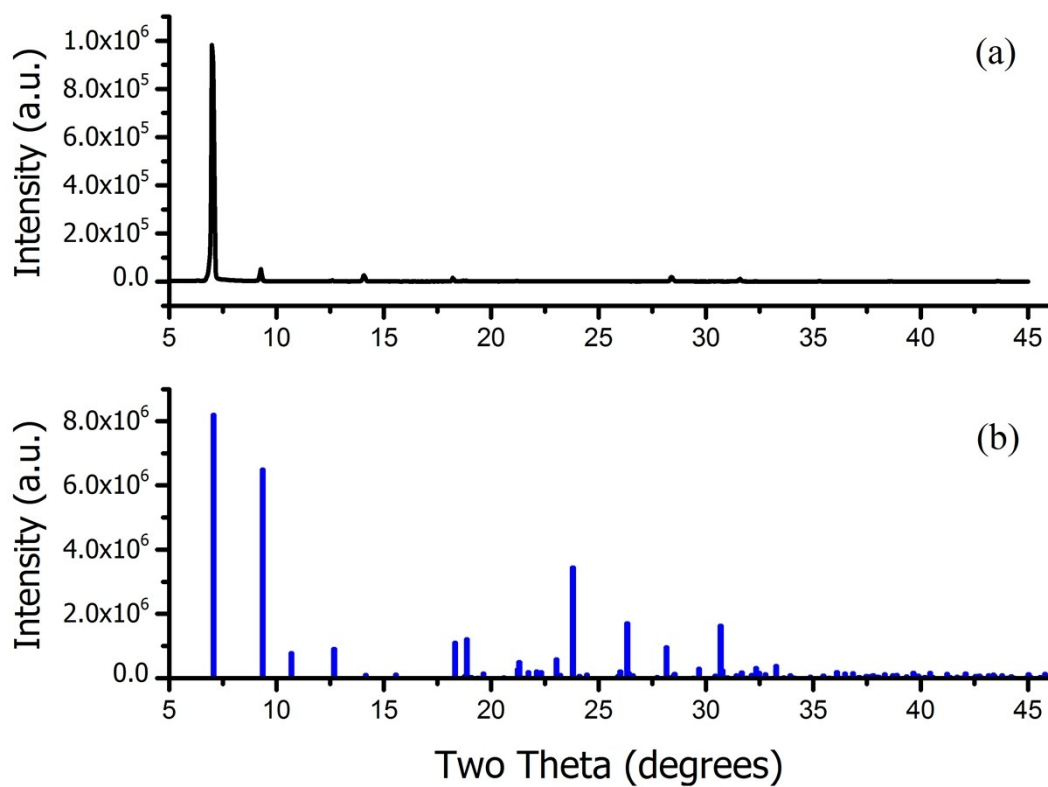

**Fig. S1.** (a) XRD pattern of as prepared ZnPc crystals. (b) The simulated XRD pattern from the single crystal diffraction model.
